# Supplementary material for: Atomically precise Au25 superatoms immobilized on CeO2 nanorods for styrene oxidation
Source: Royal Society of Chemistry journal article supplement (doi:10.1039/c3nr00144j), 2013-01-01
Supplement: c3nr00144j.pdf [file c3nr00144j.pdf]

## Supplementary Information

### Atomically precise Au<sub>25</sub> superatoms immobilized on CeO<sub>2</sub> nanorods for styrene oxidation

Ping Huang,<sup>a</sup> Guoxiang Chen,<sup>a</sup> Zhi Jiang,<sup>a</sup> Rongchao Jin,<sup>b</sup> Yan Zhu\*<sup>a</sup> and Yuhan Sun\*<sup>a,c</sup>

<sup>a</sup> Low-Carbon Conversion Center, Shanghai Advanced Research Institute, Chinese Academy of Sciences, Shanghai 201210, China.

<sup>b</sup> Department of Chemistry, Carnegie Mellon University, Pittsburgh, PA 15213, USA.

<sup>c</sup> State Key Laboratory of Coal Conversion, Institute of Coal Chemistry, Chinese Academy of Sciences, Taiyuan 030001, Shanxi, China.

E-mail: zhuy@sari.ac.cn; sunyh@sari.ac.cn

#### Experimental:

**Au<sub>25</sub> superatoms:** 0.4 mmol HAuCl<sub>4</sub>·3H<sub>2</sub>O dissolved in 5 mL nanopure water, and 0.47 mmol TOAB (tetraoctylammonium bromide) dissolved in 10 mL toluene, were combined in a 25 mL tri-neck round bottom flask. After 15 min stirring, the aqueous was removed using a 10 mL syringe. The toluene solution of gold(III) cooled down to 0°C in an ice bath over a period of 30 min. 0.17 mL PhCH<sub>2</sub>CH<sub>2</sub>SH was added. After the solution turns to clear, an aqueous solution of 4 mmol NaBH<sub>4</sub> was quickly added. After 12 hours reaction, 20 mL ethanol was added to separate Au<sub>25</sub> clusters from TOAB. Au<sub>25</sub> superatoms were obtained after removing the supernatant.

**CeO<sub>2</sub> nanorods:** 0.002 mol Ce(NO<sub>3</sub>)<sub>3</sub>·6H<sub>2</sub>O and 0.24 mol NaOH were dissolved in 40 mL nanopure water. Then, the solution was added in a 50 mL Teflon bottle with stainless steel vessel autoclave and the autoclave was transferred into an oven at 100°C. After 24 hr, the precipitates were separated by centrifugation, washed with nanopure water and ethanol several times, followed by drying at 60°C in air overnight. Yellow CeO<sub>2</sub> powders were obtained.

**Au<sub>25</sub> supported on CeO<sub>2</sub> nanorods:** 100 mg CeO<sub>2</sub> were added in a dichloromethane solution with 1%wt Au<sub>25</sub> superatoms, and the mixture was stirred for one day and then the solution was removed in flowing nitrogen.

**Catalytic test:** TBHP as an oxidant: Supported gold catalysts (100 mg powder, 1%wt loading of Au<sub>25</sub>) were mixed with styrene (12 mmol), TBHP (36 mmol) and acetonitrile (15 mL) in a 50 mL sealed glass reactor with vigorous stirring. Then the mixture was heated to 353 K for 24 h.

O<sub>2</sub> as an oxidant: A 50 mL sealed glass reactor loaded with supported gold catalyst (100 mg powder, 1% wt loading of Au), styrene (12 mmol), and acetonitrile (15 mL) was filled with dioxygen stream (99.995%). After purging to remove air the mixture was vigorously stirred and heated to 353 K for 24 h.

**Characterization:** TEM images were recorded with JEOL JEM-2100 Electron Microscope (JEOL). Powder XRD measurements were performed with a Rigaku D/Max-RB X-ray diffractometer with Cu K $\alpha$  radiation. The Brunauer–Emmett–Teller (BET) surface areas were determined by nitrogen adsorption-desorption isotherm measurements at 77 K (ASAP 2010). UV-vis spectra of the Au<sub>25</sub> (dissolved in CH<sub>2</sub>Cl<sub>2</sub>) were acquired on SHIMADZU UV-2700 diode array spectrophotometer at room temperature. All Au L<sub>3</sub>-edge X-ray absorption measurements were conducted in fluorescence mode at the hard X-ray microanalysis (HXMA) beamline. The catalytic products were analyzed by a gas chromatograph (Agilent Technologies: 6890N).

## Supporting Figures

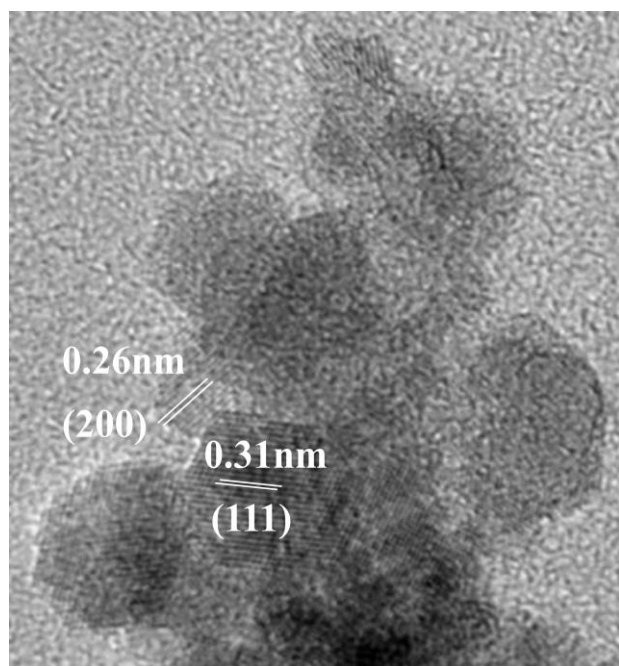

**Fig. S1.** HRTEM image of CeO<sub>2</sub> nanoparticles.

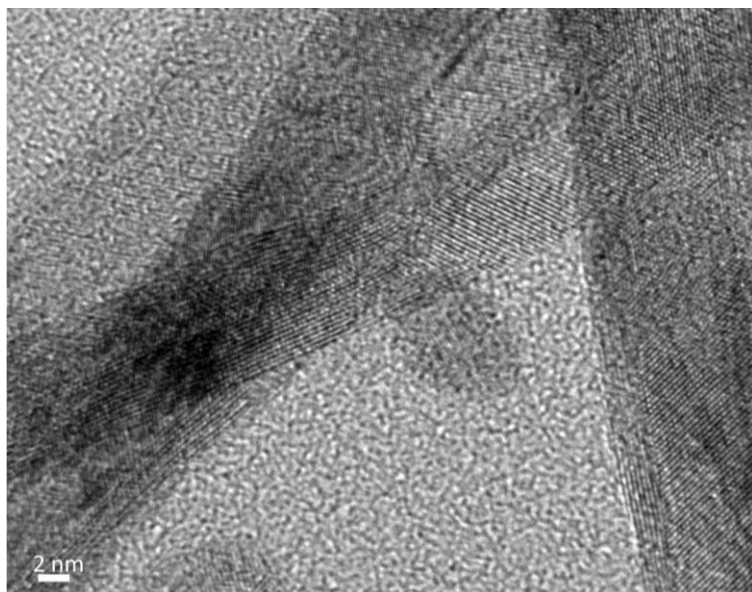

**Fig. S2.** HRTEM image of Au<sub>25</sub>/CeO<sub>2</sub> nanorods.

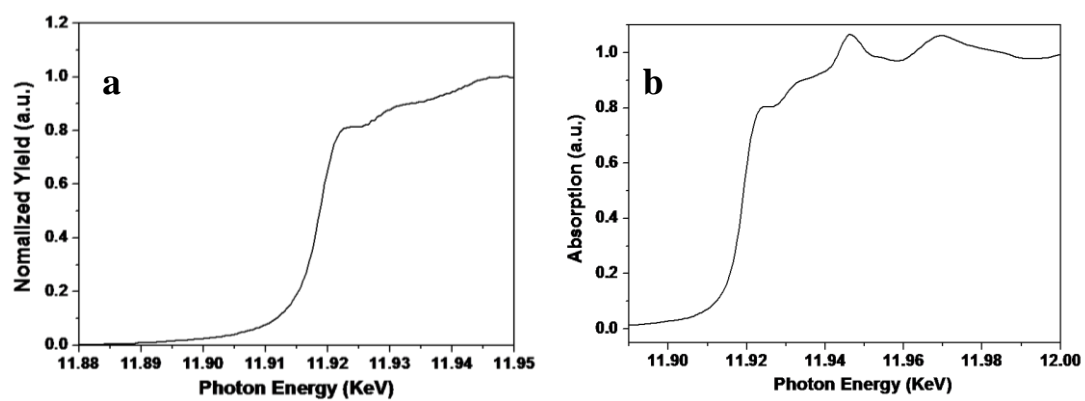

**Fig. S3.** Au L<sub>3</sub> edge XANES spectra of (a) Au<sub>25</sub>/CeO<sub>2</sub> catalyst after reaction and (b) metallic gold nanocrystals.
